# Supplementary material
Source: PubMed Central journal article supplement (PMC4917390)
Supplement: NIHMS795622-supplement-supplement_1.pdf [file NIHMS795622-supplement-supplement_1.pdf]

**Table E1.** Estimated relative change in ED visits according to primary reason for visit (Clinical Classifications Software category) by state of residence and sex.\*

| Diagnostic Category                      | California           | Florida              | New York             | Men                  | Women                |
|------------------------------------------|----------------------|----------------------|----------------------|----------------------|----------------------|
| All                                      | -0.5 (-1.1 to 0.1)   | -1.3 (-2.0 to -0.6)  | 0.2 (-0.4 to 0.8)    | 0.3 (-0.3 to 0.9)    | -1.1 (-1.6 to -0.6)  |
| Injury and poisoning                     | 0.6 (-0.4 to 1.6)    | -1.3 (-2.4 to -0.1)  | 0.7 (-0.3 to 1.8)    | 0.5 (-0.4 to 1.3)    | -0.3 (-1.2 to 0.7)   |
| Ill-defined conditions                   | -0.1 (-1.5 to 1.2)   | -0.4 (-2.0 to 1.1)   | 0.8 (-0.7 to 2.4)    | 0.7 (-0.8 to 2.1)    | -0.2 (-1.3 to 0.9)   |
| Complications of pregnancy or childbirth | -4.2 (-6.1 to -2.3)  | -5.5 (-7.6 to -3.4)  | -2.5 (-4.3 to -0.5)  | NA                   | -3.0 (-4.9 to -2.6)  |
| Respiratory system diseases              | -1.7 (-3.2 to -0.2)  | -0.9 (-2.5 to 0.8)   | 0.3 (-1.3 to 2)      | 2.0 (-0.7 to 2.3)    | -1.9 (-3 to -0.7)    |
| Genitourinary diseases                   | -0.1 (-1.8 to 1.7)   | 0 (-1.7 to 1.7)      | 1.3 (-0.6 to 3.2)    | 4.6 (2 to 7.2)       | -0.8 (-1.9 to 0.4)   |
| Digestive system diseases                | 0.7 (-1.2 to 2.5)    | -2 (-3.8 to -0.1)    | 0.4 (-1.4 to 2.3)    | 0.2 (-1.0 to 1.8)    | -0.4 (-1.8 to 1.0)   |
| Nervous system diseases                  | 0.7 (-1.2 to 2.5)    | -1.1 (-3.0 to 0.9)   | -0.5 (-2.4 to 1.4)   | -0.9 (-2.7 to 0.9)   | 0.5 (-0.9 to 1.9)    |
| Mental illness                           | 0.2 (-2.1 to 2.7)    | -1.5 (-4.4 to 1.5)   | 1.4 (-0.9 to 3.9)    | 1.1 (-1 to 3.1)      | -0.3 (-2.4 to 1.8)   |
| Musculoskeletal diseases                 | 0.4 (-1.8 to 2.7)    | -2.7 (-4.9 to -0.4)  | 0.7 (-1.4 to 2.8)    | -0.9 (-2.8 to 1.1)   | 0.3 (-1.4 to 2.0)    |
| Skin diseases                            | -4 (-6.4 to -1.5)    | -4.5 (-6.8 to -2.1)  | -1.3 (-4.0 to 1.4)   | -3.8 (-5.8 to -1.8)  | -3.2 (-5.2 to -1.1)  |
| Circulatory system diseases              | 4.8 (2.1 to 7.6)     | 5.4 (2.6 to 8.3)     | 4.2 (1.4 to 7.1)     | 8 (5.6 to 10.4)      | 2.2 (0.0 to 4.3)     |
| Infectious diseases                      | -2.6 (-5.8 to 0.8)   | 0.6 (-2.9 to 4.2)    | -2.2 (-5.1 to 0.9)   | -3.1 (-5.9 to -0.1)  | 0 (-2.4 to 2.6)      |
| Endocrine and metabolic diseases         | 0 (-5.0 to 5.3)      | 0.8 (-4.9 to 6.8)    | 0.7 (-5.3 to 7.2)    | 4.6 (-0.4 to 9.8)    | -3.1 (-7.3 to 1.2)   |
| Blood diseases                           | -3.8 (-19.7 to 15.3) | -2.7 (-13.7 to 9.8)  | 5.4 (-6.9 to 19.3)   | -3.4 (-20.4 to 17.1) | 0.4 (-7.6 to 9)      |
| Neoplasms                                | -2.8 (-17.6 to 14.7) | -1.4 (-14.3 to 13.5) | -6.1 (-18.1 to 7.6)  | -4.7 (-19.5 to 12.8) | -3.2 (-12.0 to 6.5)  |
| Congenital anomalies                     | 24.2 (-10.7 to 72.9) | 11.4 (-24.8 to 64.9) | 13.4 (-20.7 to 62.4) | 16.9 (-13.1 to 57.2) | 16.4 (-13.3 to 56.3) |

NA, Not applicable.

\*The modeled relative change in the number of ED visits per patient was estimated with a negative binomial model, with change after the implementation of the ACA provision measured by the interaction of the post-ACA period and the younger age group.

**Table E2.** Sensitivity analysis: changes in ED of 22- to 23-year-olds compared with 28- to 29-year olds according to primary reason for visit (Clinical Classifications Software category), 2009 to 2011.\*

| CCS Category                             | Estimated Change in Number of Visits, %* | Estimated Change in Probability of an ED Visit† |
|------------------------------------------|------------------------------------------|-------------------------------------------------|
| Overall                                  | -1.2 (-1.9 to -0.6)                      | -0.8 (-1.4 to -0.2)                             |
| Complications of pregnancy or childbirth | -5.0 (-6.9 to -3.0)                      | -4.6 (-6.3 to -2.9)                             |
| Infectious diseases                      | -5.0 (-8.2 to -1.7)                      | -5.3 (-8.4 to -2.1)                             |
| Neoplasms                                | -2.7 (-15.2 to 11.7)                     | -2.8 (-14.7 to 10.7)                            |
| Endocrine and metabolic diseases         | 1.3 (-4.4 to 7.3)                        | 3.8 (-1.3 to 9.2)                               |
| Blood diseases                           | 1.8 (-10.2 to 15.4)                      | 2.0 (-7.7 to 12.8)                              |
| Mental illness                           | -0.6 (-3.1 to 2.1)                       | 3.4 (1.1 to 5.8)                                |
| Nervous system diseases                  | 0.1 (-1.8 to 2.1)                        | -0.6 (-2.4 to 1.1)                              |
| Circulatory system diseases              | 4.6 (1.8 to 7.5)                         | 3.8 (1.2 to 6.5)                                |
| Respiratory system diseases              | -2.0 (-3.6 to -0.3)                      | -2.6 (-4.1 to -1.1)                             |
| Digestive system diseases                | -0.8 (-2.6 to 1.1)                       | -0.9 (-2.5 to 0.9)                              |
| Genitourinary diseases                   | 0.2 (-1.7 to 2.0)                        | -0.6 (-2.3 to 1.1)                              |
| Skin diseases                            | -4.1 (-6.6 to -1.6)                      | -3.8 (-6.1 to -1.5)                             |
| Musculoskeletal diseases                 | -0.6 (-2.8 to 1.7)                       | 0.1 (-2.0 to 2.2)                               |
| Congenital anomalies                     | 9.9 (-24.8 to 60.6)                      | 7.9 (-19.1 to 43.9)                             |
| Injury and poisoning                     | -0.7 (-1.8 to 0.4)                       | -0.2 (-1.2 to 0.9)                              |
| Ill-defined conditions                   | -0.6 (-2.2 to 0.9)                       | -0.4 (-1.8 to 1.1)                              |

\*The modeled relative change in the number of ED visits per patient was estimated with a negative binomial model, with change after the implementation of the ACA provision measured by the interaction of the post-ACA period and the younger age group.

†The modeled change in the probability of young adults ever using the ED pre-ACA versus post-ACA was estimated with Poisson relative-risk regression analysis, with change after the implementation of the ACA provision measured by the interaction of the post-ACA period and the younger age group.
